# Supplementary material for: KCNQ2 and KCNQ5 form heteromeric channels independent of KCNQ3
Source: PubMed Central journal article supplement — Proc Natl Acad Sci U S A. 2022 Mar 23;119(13):e2117640119. doi: 10.1073/pnas.2117640119 (PMC9060518; doi:10.1073/pnas.2117640119), 2022-03-23
Supplement: pnas.2117640119.sapp.pdf [file pnas.2117640119.sapp.pdf]

## Supplementary Information

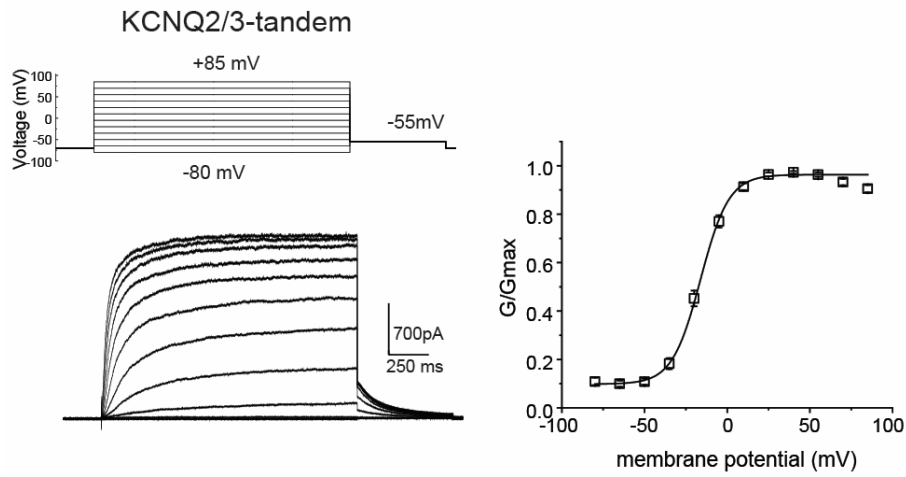

**Figure S1. Trans-splicing of KCNQ2 and KCNQ3 leads to functional KCNQ2/3-tandem channels.** Left, representative traces from HEK293T cells co-expressing KCNQ2-ER-n and KCNQ3-ER-c. KCNQ2/3-tandem refers to tandem KCNQ2/3 channels. Right, summary graph showing the KCNQ2/3-tandem conductance-to-voltage relationship. Data were fit using the Boltzmann equation ( $V_{0.5} = -15.7 \pm 1.4$  mV,  $n=23$ ). Data are displayed as mean  $\pm$  s.e.m.

**A**

KCNQ3\_MOUSE, 96,855.4 Da (Cortex Kcnq2 flag/flag)  
Potassium voltage-gated channel subfamily KQT member 3 OS=Mus musculus GN=Kcnq3  
339/873 amino acids (39% coverage)

|     |             |             |              |             |             |
|-----|-------------|-------------|--------------|-------------|-------------|
| 1   | MGLKARRAAG  | AAGGGGEGG   | GGGGGAANPA   | GGDSAVAGDE  | ERKVG LAPGD |
| 51  | VEQVTLALGA  | GADKDG TLL  | EGGREGGQR    | RTPQGIGLLA  | KTPLSRPVKR  |
| 101 | NNAKYRRIQT  | LIYDALERPR  | GWALLYHALV   | FLIVLGC LIL | AVLTTFK EYE |
| 151 | TVSGDWL LLL | ETFAIFIFGA  | EFALR IWAAG  | CCCR YKGRWG | RLKFARKPLC  |
| 201 | MGDIFVLIAS  | VPVVAVGNQG  | NVLATSLRSL   | RFLQILRLR   | MDRRGGTWKL  |
| 251 | LGS AICAHSK | ELITAWYIGF  | LTLILSSFLV   | YLVEKDVPEM  | DAQGEEMKEE  |
| 301 | FETYADALW   | GLITLATIGY  | GDKTPKTWEG   | RLIAATFSLI  | GVSFFALPAG  |
| 351 | ILGSG LALKV | QEQRQKHFE   | KRKKPAELI    | QAAR Y YATN | PNRLDLVATW  |
| 401 | RFYESVVSFP  | FFRKEQLEAA  | ASQKLG LLD   | VRLSNPRGSN  | TKGK LFTPLN |
| 451 | YDAIEESPSK  | EPKPVGLNKK  | ERFR TAFR MK | AYAFWQSS ED | AGTGDPMAED  |
| 501 | RGYGNDFLIE  | DMIPTLWAAI  | RAVRILQFRL   | YKKKFKETLR  | PYDVK DVIEQ |
| 551 | YSAGHLMLS   | RIKYLQTRID  | MIPTGPPST    | PKHKKSQKGS  | AFTYPSQQSP  |
| 601 | RNEPYVARAA  | TSETEDQSM   | GK FVKVERQV  | HDMGK LDFL  | VDMHMHMER   |
| 651 | LQVHVTEYYP  | TKGASSPAEG  | EKKEDNRYSD   | LKTIICNYSE  | TGPPDP PYSF |
| 701 | HQVPIDRVGP  | YGFFAHDPVK  | LTRGGPSSTK   | AQANLPSSGS  | TYAERPTVLP  |
| 751 | LLTLLDSCVS  | YHSQTE LQGP | YSDHISFRQR   | RSITRDS DTF | LSLMSVNH EE |
| 801 | LERSPSFGFSI | SQRDDYVFG   | PSGGSSWMRE   | KRYLAEGETD  | TDTD PFTPSG |
| 851 | SMPMSSTGDG  | ISDSIWTPSN  |              |             |             |

KCNQ5\_MOUSE, 104,625.8Da (Cortex Kcnq2 flag/flag)  
Potassium voltage-gated channel subfamily KQT member 5 OS=Mus musculus GN=Kcnq5  
167/893 amino acids (18% coverage)

|     |             |              |             |             |             |
|-----|-------------|--------------|-------------|-------------|-------------|
| 1   | MPRHAGGEE   | GGAAGLWVRS   | GAAAAAGAGG  | GRPGSGMKDV  | ESGRGRVLLN  |
| 51  | SAAARGDGLL  | LLGTRAAALG   | GGGGGLRESR  | RGKQGARMSL  | LGKPLSYTSS  |
| 101 | QSCRRNVKYR  | RVQNYLYNVL   | ERPRGWAFVY  | HAFVFLLVFG  | CLILSVFSTI  |
| 151 | PEHTKLASSC  | LLILEFVMIV   | VFGLEFIIRI  | WSAGCCCRYR  | GWQGR LRFAR |
| 201 | KPFCVIDTIV  | LIASIAV VSA  | KFOGNIFATS  | ALRSLRFLQI  | LRMVRMDRRG  |
| 251 | GTWKL LGSVV | YAHSKELITA   | WYIGFLV LIF | SSFLVYLV EK | DANKEFSTYA  |
| 301 | DALWWTITL   | TTIGYGDKTP   | LTWLGRLLSA  | GFALLGISFF  | ALPAGILGSG  |
| 351 | FALKVQEQHR  | QKHFEKRRNP   | AANLIQC VWR | SYAADEKSVS  | IATWKPHLKA  |
| 401 | LHTCSPTKKE  | QGEASSSKFC   | SNKQKFFRVY  | TSRQSQSKLS  | FKERV RMASP |
| 451 | RGQSIKSRQA  | SVGDRRSPST   | DITAE GSPTK | VQKSWSFNDR  | TRFRSLRLK   |
| 501 | SSQPKPVIDA  | D TALGIDDDVY | DEKGCQCDVS  | VEDLTPPLKT  | VIRAIRIMKF  |
| 551 | HVAKRKFKET  | LRPYDVKDVI   | EQYSAGHLDM  | LCRIKSLQTR  | VDQILGK GQM |
| 601 | TSDKKSREKI  | TAEHETDDP    | SMLARVVKVE  | KQVQSIESKL  | DCLLDIYQQV  |
| 651 | LRKGSASALT  | LASFQIP PFE  | CEQTS DYQSP | VDSK DLSGSA | QNSGCLTRSA  |
| 701 | SANISRGLQF  | ILTPNEFSAQ   | TFYALSPTMH  | SQATQVPMSQ  | NDGSSVVATN  |
| 751 | NIANQISAAP  | KPAAPTTLQI   | PPPLSAIKHL  | SRPEPLSNP   | TGLQESISDV  |
| 801 | TTCLVASKES  | VQFAQSNLTK   | DRSLRKS FDM | GGETLLSVRP  | MVPKDLGKSL  |
| 851 | SVQNLIRSTE  | ELNLQFSGSE   | SSGSRGSQDF  | YPKWRESKLF  | ITDEEVGAEE  |
| 901 | TETD TDFDGT | PPAGEAAFSS   | DSLRTGRSRS  | SQNICK TGD  | TDALSLPHVK  |
| 951 | LN          |              |             |             |             |

**B**

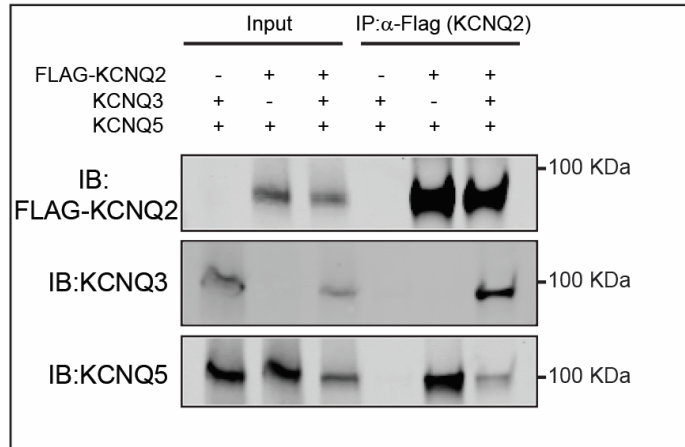

**Figure S2. KCNQ3 and KCNQ5 forms a complex with KCNQ2 channels.** (A) Representative KCNQ3 and KCNQ5 peptide coverage retrieved from anti-FLAG-KCNQ2 cortical IPs of *Kcnq2<sup>flag/flag</sup>* mice. Yellow indicates recovered peptides. (B) Immunoblot showing immunoprecipitated proteins from HEK293T cells expressing various 3X-FLAG KCNQ2, KCNQ3, and KCNQ5 subunit combinations. Immunoprecipitation was performed using an anti-FLAG M2 antibody.

**Table S1.** Biophysical properties of HEK293T cells expressing different combinations of KCNQ2-, KCNQ5-, and KCNQ3-containing channels.

|                                               | <b>V<sub>0.5</sub> (mV)<br/>mean ± S.D.</b> | <b>Slope (k)<br/>mean ± S.D.</b> | <b>Current density<br/>(G<sub>max</sub>/pF)<br/>mean ± S.D.</b>         |
|-----------------------------------------------|---------------------------------------------|----------------------------------|-------------------------------------------------------------------------|
| <b>untransfected<br/>HEK293T</b>              | N.D.                                        | N.D.                             | 2.4 ± 1.0 (n=8)                                                         |
| <b>KCNQ2-ER-n</b>                             | N.D.                                        | N.D.                             | 2.6 ± 0.6 (n=7)                                                         |
| <b>KCNQ3-ER-c</b>                             | N.D.                                        | N.D.                             | 2.0 ± 0.2 (n=7)                                                         |
| <b>KCNQ5-ER-c</b>                             | N.D.                                        | N.D.                             | 2.4 ± 0.5 (n=7)                                                         |
| <b>KCNQ2-ER-n +<br/>Calm</b>                  | N.D.                                        | N.D.                             | 2.6 ± 1.0 (n=5)                                                         |
| <b>KCNQ5-ER-c +<br/>Calm</b>                  | N.D.                                        | N.D.                             | 4.2 ± 2.3 (n=5)                                                         |
| <b>KCNQ2/Q5-<br/>tandem</b>                   | -11.1 ± 9.3 (n=23)                          | 13.4 ± 6.9 (n=23)                | 7.3 ± 17.7 (n=35)                                                       |
| <b>KCNQ2/Q5-<br/>tandem + Calm</b>            | -8.6 ± 10.2 (n=22)                          | 12.3 ± 4.2 (n=22)                | 13.5 ± 8.3 (n=32) <sup>a</sup><br>p=0.002                               |
| <b>KCNQ2/Q5-<br/>tandem + Calm<br/>(30°C)</b> | -15.8 ± 8.4 (n=9)                           | 11.28 ± 2.9 (n=9)                | 17.3 ± 16.8 (n=14) <sup>a</sup><br>p=0.006                              |
| <b>KCNQ2/Q5-<br/>tandem + PIP5K</b>           | -31.5 ± 6.2 (n=6)                           | 15.5 ± 9.1 (n=6)                 | 32.8 ± 15.2 (n=6) <sup>a</sup><br>p=1.3x10 <sup>-7</sup>                |
| <b>KCNQ3 WT</b>                               | -21.7 ± 10.5 (n=11)                         | 7.7 ± 1.3 (n=11)                 | 41.0 ± 17.7 (n=10)                                                      |
| <b>KCNQ2/Q5-<br/>tandem + KCNQ3</b>           | -14.4 ± 7.2 (n=18)                          | 9.6 ± 3.4 (n=18)                 | 78.4 ± 38.9<br>(n=19) <sup>a,c</sup> p=1.8x10 <sup>-14</sup><br>p=0.008 |
| <b>KCNQ2/3</b>                                | -29.6 ± 2.2 (n=3)                           | 12.5 ± 1.5 (n=3)                 | 197.1 ± 36.0 (n=3) <sup>b</sup><br>p=7.2x10 <sup>-8</sup>               |
| <b>KCNQ2/Q3-<br/>tandem</b>                   | -15.7 ± 6.9 (n=23)                          | 9.2 ± 2.8 (n=23)                 | 28.7 ± 31.4 (n=18) <sup>b</sup>                                         |
| <b>KCNQ2/Q3-<br/>tandem + Calm</b>            | -19.0 ± 6.8 (n=19)                          | 9.3 ± 2.8 (n=19)                 | 54.4 ± 57.1 (n=20) <sup>b</sup><br>p=0.1                                |

a, *t*-test versus KCNQ2/Q5-tandem

b, *t*-test versus KCNQ2/Q3-tandem

c, *t*-test versus KCNQ3 WT
